# Supplementary material for: Highly stable surface-enhanced Raman spectroscopy assay on abnormal thrombin levels in the blood plasma of cancer patients
Source: Royal Society of Chemistry journal article supplement (doi:10.1039/d1ay01002f), 2021-01-01
Supplement: d1ay01002f1.pdf [file d1ay01002f1.pdf]

## *Supporting information*

*for*

### **Highly Stable Surface-enhanced Raman Spectroscopy Assay on Abnormal Thrombin Levels in Blood Plasma of Cancer Patients**

Lingling Liao,<sup>a,b,†</sup> Shanshan Du,<sup>b,c,†</sup> Yan Ding,<sup>a,c</sup> Mengke Su,<sup>c</sup> Ting Yu,<sup>c</sup> Tingmei Duan,<sup>a</sup> Qinghe Li,<sup>a</sup> Shengnan He,<sup>b,\*</sup> Hongyan Wang,<sup>a,\*</sup> and Honglin Liu<sup>c</sup>

<sup>a</sup> First Affiliated Hospital of Anhui Medical University, Hefei 230000, China

<sup>b</sup> Institute of Physical Science and Information Technology, Anhui University, Hefei, Anhui 230039, China.

<sup>c</sup> School of Food and Biological Engineering, Hefei University of Technology, Hefei 230009, China

\*Correspondence: whhy5000@163.com ; heshengnan@ahu.edu.cn

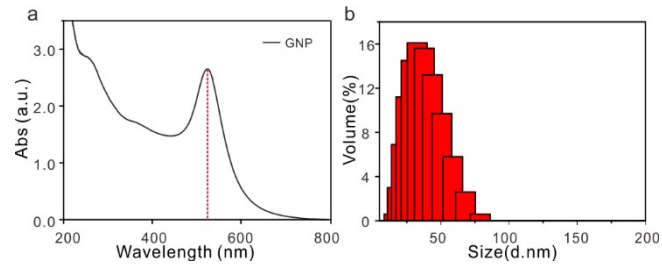

**Figure S1.** (a) UV-Vis spectra of GNP; (b) The particle sizes of GNPs measured by DLS.

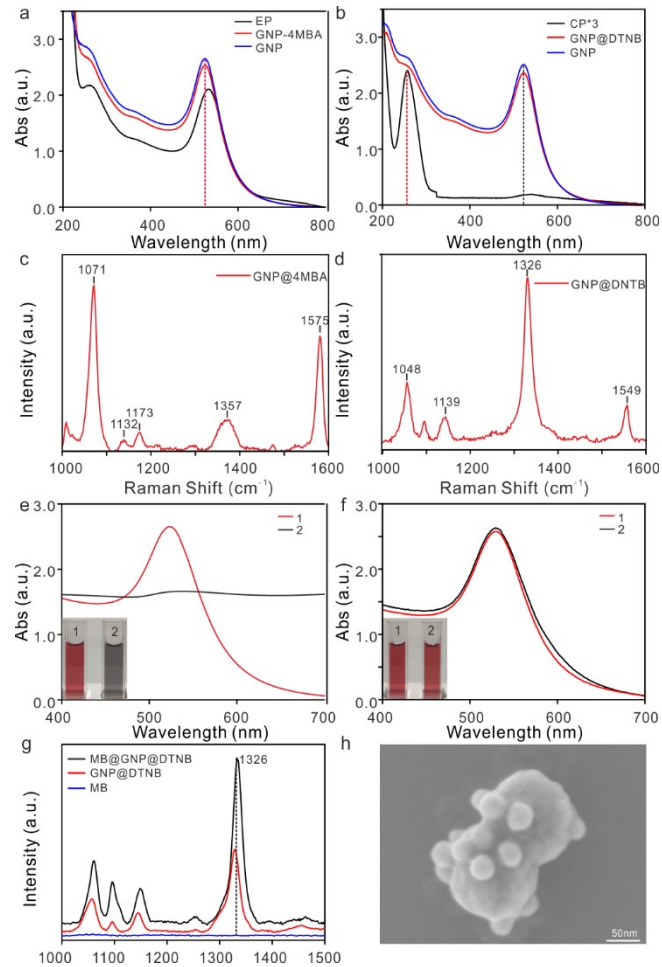

**Figure S2.** (a and b) UV-Vis spectra of as-prepared GNP, GNP@4MBA, EP, GNP@DTNB, and CP, respectively; (c and d) SERS spectra of the as-prepared GNP@4MBA, GNP@DTNB; (e and f) UV-Vis spectra of the pure GNP sols and the as-prepared EP, respectively, in the absence (1, red line) or presence (2, black line) of 2 M NaCl. The inserts are the photo of corresponding solutions; (g) SERS spectra of the as-prepared MB, GNP@DTNB, and MB@GNP@DTNB; (h) SEM image of CP.

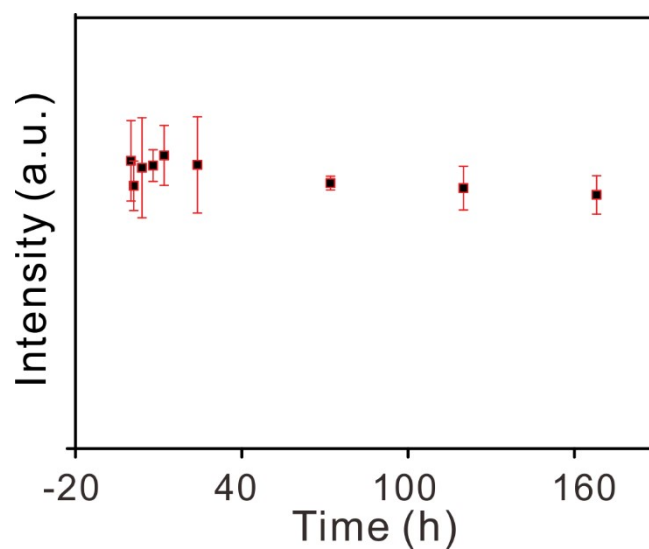

**Figure S3.** The Raman intensity of CP changes within 7 days, and the error bar represents the error of three measurements.

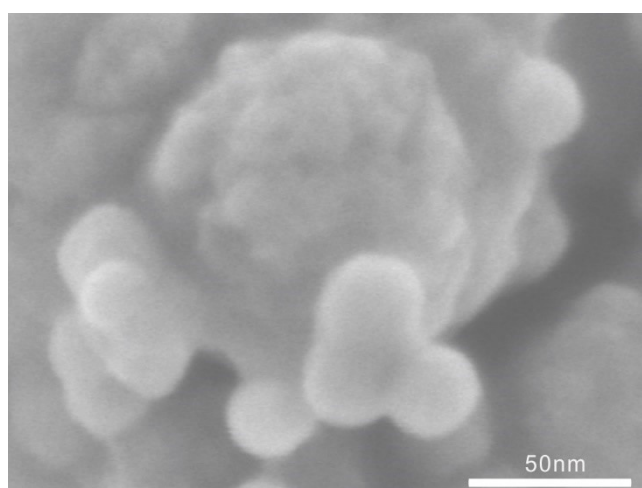

**Figure S4.** SEM image of EP/TB/CP.

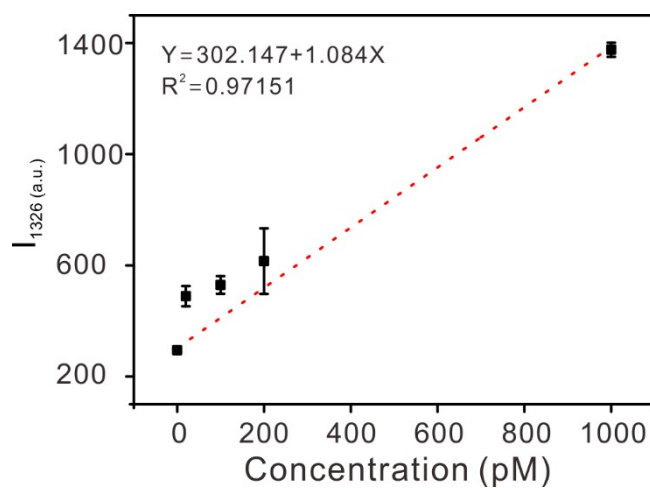

**Figure S5.** The calibration curve for the SERS intensity at 1326 cm<sup>-1</sup> as a linear function of the

concentration of TB ( $R^2=0.97151$ ). Error bars indicate standard deviations from three measurements.

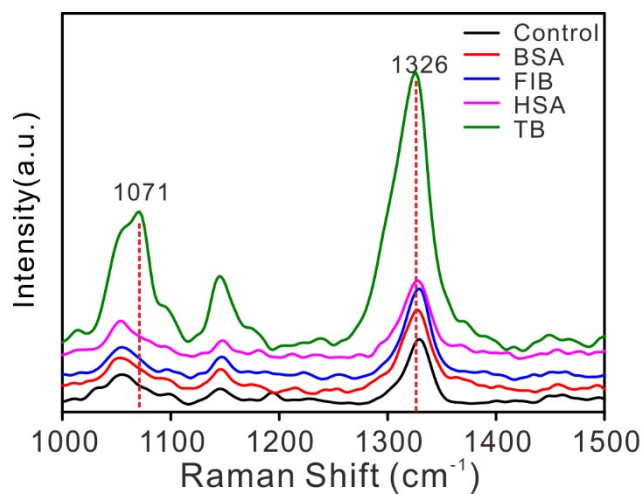

**Figure. S6** Raman spectra of different proteins.

**Table S1.** Functional groups and vibration modes of reporter molecules 4MBA and DTNB. <sup>1,2</sup>

| Raman Shift<br>4MBA (cm <sup>-1</sup> ) | Assignment            | Raman Shift<br>DTNB (cm <sup>-1</sup> ) | Assignment              |
|-----------------------------------------|-----------------------|-----------------------------------------|-------------------------|
| 1071                                    | v(CC) <sub>ring</sub> | 1048                                    | CH <sub>3</sub> rocking |
| 1132                                    | δ(CH)                 | 1139                                    | v (CN) and δ (CN)       |
| 1173                                    | δ(CH)                 | 1326                                    | vs(NO <sub>2</sub> )    |
| 1357                                    | vs(COO <sup>-</sup> ) | 1549                                    | v (aromatic ring)       |
| 1575                                    | v(CC) <sub>ring</sub> |                                         |                         |

**Table S2.** Statistical analysis of intensity at 1071 cm<sup>-1</sup> and 1326 cm<sup>-1</sup> in cancer patients, normal and control.

| 1071cm <sup>-1</sup> | <i>p</i> | 1326 cm <sup>-1</sup> | <i>p</i> |
|----------------------|----------|-----------------------|----------|
| Cancer1- Control     | P<0.001  | Cancer1- Normal       | P<0.001  |
| Cancer2-Control      | P<0.001  | Cancer2-Control       | P<0.001  |
| Cancer3-Control      | P<0.001  | Cancer3-Control       | P<0.001  |
| Cancer1-Normal       | 0.013    | Cancer1-Normal        | 0.002    |
| Cancer2- Normal      | 0.003    | Cancer2- Normal       | 0.025    |
| Cancer3- Normal      | 0.002    | Cancer3- Normal       | P<0.001  |
| Normal- Control      | P<0.001  | Normal- Control       | 0.009    |

## Reference

1. C. J. Orendorff, A. Gole, T. K. Sau and C. J. Murphy, *Analytical Chemistry*, 2005, **77**, 3261-3266.
2. C. C. Lin and C. W. Chang, *Biosensors & Bioelectronics*, 2014, **51**, 297-303.
